# Supplementary material for: The effect of nanoparticle location and shape on thermal transitions observed in hydrated layer-by-layer assemblies
Source: Royal Society of Chemistry journal article supplement (doi:10.1039/c4sm01527d), 2014-01-01
Supplement: c4sm01527d1.pdf [file c4sm01527d1.pdf]

## Electronic Supplementary Information for:

### The Effect of Nanoparticle Location and Shape on the Thermal Transitions

#### Observed in Hydrated Layer-by-Layer Assemblies

Joseph T. Puhr,<sup>a</sup> Benjamin E. Swerdlow,<sup>b</sup> Jodie L. Lutkenhaus<sup>a,c</sup>

<sup>a</sup>Department of Materials Science & Engineering, Texas A&M University, College Station, TX 77843.

<sup>b</sup>Department of Materials Science & Engineering, University of Florida, Gainesville, FL 32611.

<sup>c</sup>Artie McFerrin Department of Chemical Engineering, Texas A&M University, College Station, TX 77843.

To which all correspondences should be addressed: [jodie.lutkenhaus@che.tamu.edu](mailto:jodie.lutkenhaus@che.tamu.edu)

---

|                                                                                                                      |    |
|----------------------------------------------------------------------------------------------------------------------|----|
| 1. Figure S1. Linear Temperature Correction for Frequency Data.....                                                  | S2 |
| 2. Table S1. Fit Parameters for the Frequency Linear Temperature Correction.....                                     | S2 |
| 3. Figure S2. Linear Temperature Correction for Dissipation Data. ....                                               | S2 |
| 4. Table S2. Fit Parameters for the Dissipation Linear Temperature Correction .....                                  | S3 |
| 5. Table S3. Fitted Parameters Used for Extended Voigt Modeling Process .....                                        | S3 |
| 6. Extended Voigt Model Equations.....                                                                               | S3 |
| 7. Figure S3. Raw and Fitted Frequency Data for PDAC/PSS LbL Assembly<br>Incorporating SiO <sub>2</sub> and LAP..... | S4 |
| 8. Figure S4. Reversible Heat Flow MDSC data for PDAC/PSS Films<br>Incorporating LAP. ....                           | S5 |

---

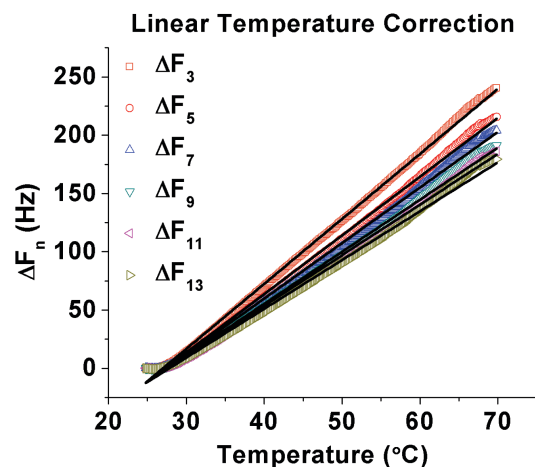

**Figure S1.** Linear temperature correction used for all frequency data. This correction was generated by fitting a linear trend line to the average of five separate bare crystal measurements. A bare crystal experiment consisted of flowing water with 0.5 M NaCl over a bare quartz QCM-D crystal while ramping from 25 to 70 °C. Colored points refer to data and the black line is the linear fit.

**Table S1.** Fitted Parameters for the Linear Temperature Correction of  $\Delta F$

|       | $3^{rd}$   | $5^{th}$   | $7^{th}$   | $9^{th}$   | $11^{th}$  | $13^{th}$  |
|-------|------------|------------|------------|------------|------------|------------|
| $m$   | 5.57483    | 5.0355     | 4.7652     | 4.46392    | 4.34358    | 4.18887    |
| $b$   | -150.46108 | -137.56887 | -130.70455 | -123.13058 | -120.07559 | -116.48175 |
| $R^2$ | 0.99742    | 0.99617    | 0.99546    | 0.99467    | 0.99424    | 0.99345    |

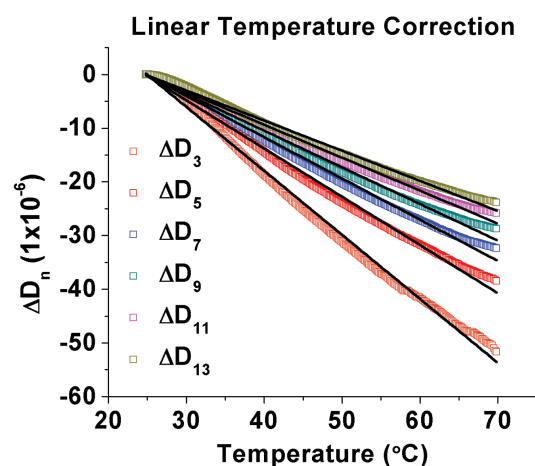

**Figure S2.** Linear temperature correction used for all dissipation data. This correction was generated by fitting a linear trend line to the average of five separate bare crystal measurements. A bare crystal experiment consisted of flowing water with 0.5 M NaCl over a bare quartz QCM-D crystal while ramping from 25 to 70 °C. Colored points refer to data and the black line is the linear fit.

**Table S2.** Fitted Parameters for the Linear Temperature Correction of  $\Delta D$ 

|                | 3 <sup>rd</sup> | 5 <sup>th</sup> | 7 <sup>th</sup> | 9 <sup>th</sup> | 11 <sup>th</sup> | 13 <sup>th</sup> |
|----------------|-----------------|-----------------|-----------------|-----------------|------------------|------------------|
| <i>m</i>       | -1.19263        | -0.89875        | -0.76839        | -0.68276        | -0.61342         | -0.5617          |
| <i>b</i>       | 29.75383        | 22.16815        | 19.06106        | 16.85143        | 15.17946         | 13.88901         |
| R <sup>2</sup> | 0.99519         | 0.9942          | 0.99413         | 0.99349         | 0.99399          | 0.99402          |

**Table S3.** Fitted Parameters Used for Extended Voigt Modeling

| <i>Parameters to Fit:</i>                          | <i>Minimum</i> | <i>Maximum</i> | <i>Step (Iterations)</i> |
|----------------------------------------------------|----------------|----------------|--------------------------|
| L1 Viscosity (kg m <sup>-1</sup> s <sup>-1</sup> ) | 0.0001         | 0.01           | 50                       |
| L1 Shear (Pa)                                      | 100            | 1E12           | 21                       |
| L1 Thickness (m)                                   | 9.5238E-11     | 1E-6           | 21                       |
| L1 Viscosity Frequency                             | -2             | 0              | 10                       |
| L1 Shear Frequency                                 | 0              | 2              | 10                       |

*Note:* The fixed parameters utilized for these models were: fluid density (kg m<sup>-3</sup>) of 1000, fluid viscosity (kg m<sup>-1</sup> s<sup>-1</sup>) of 0.001, and L1 density (kg m<sup>-3</sup>) of 1100.

### Extended Voigt Model Equations:

The application of the extended Voigt model is described very well by Sun *et al.* (*Macromolecules* 2014, *ASAP*, <http://dx.doi.org/10.1021/la500716d>). The standard Voigt model assumes a frequency-independent shear elastic modulus and viscosity. The extended Voigt model allows for the shear elastic modulus and viscosity to vary with thickness according to Eqns. 1 and 2.  $f_0$  is the fundamental frequency (5 MHz),  $G_n'$  is the shear modulus for overtone  $n$ , and similarly for shear viscosity  $\eta$ .

$$G_n' = G_0' \left( \frac{f_n}{f_0} \right)^{\alpha'} \quad (1)$$

where  $G_0'$  equals L1 Shear,  $f_n/f_0$  is approximately equal to the  $n^{\text{th}}$  overtone, and  $\alpha'$  equals the L1 Shear Frequency.

$$\eta_n = \eta_0 \left( \frac{f_n}{f_0} \right)^{\alpha''} \quad (2)$$

where  $\eta_0$  equals L1 Viscosity,  $f_n/f_0$  is approximately equal to the  $n^{\text{th}}$  overtone, and  $\alpha''$  equals the L1 Viscosity Frequency.

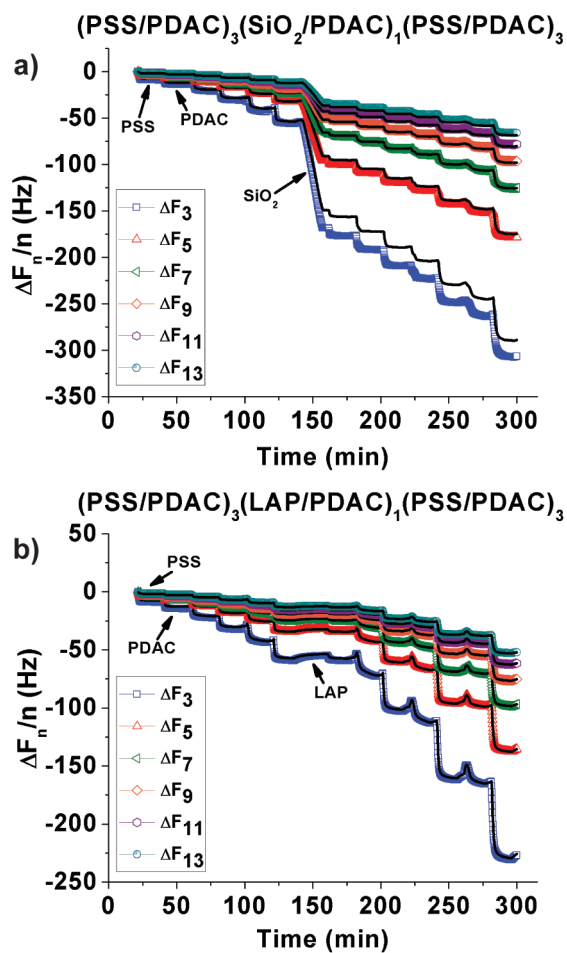

**Figure S3.** Raw ( $\Delta F_3$  = blue,  $\Delta F_5$  = red,  $\Delta F_7$  = green,  $\Delta F_9$  = orange,  $\Delta F_{11}$  = purple, and  $\Delta F_{13}$  = turquoise) and fitted (black lines) frequency data for PDAC/PSS films incorporating a)  $SiO_2$  and b) LAP. This figure serves to illustrate the abrupt change in film properties following the adsorption of the nanoparticle layer.

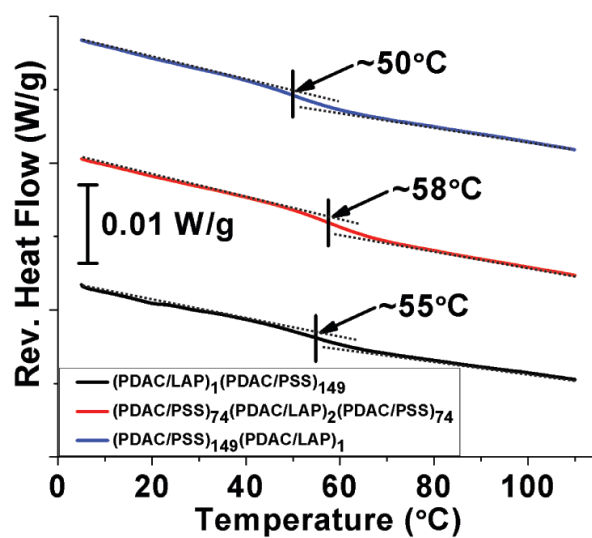

**Figure S4.** Reversing heat flow for (PDAC/LAP)<sub>1</sub>(PDAC/PSS)<sub>149</sub> (black line), (PDAC/PSS)<sub>74</sub>(PDAC/LAP)<sub>2</sub>(PDAC/PSS)<sub>74</sub> (red line), and (PDAC/PSS)<sub>149</sub>(PDAC/LAP)<sub>1</sub> (blue line) films obtained via MDSC.
